# Supplementary material for: Epitaxial growth of Au@Pd core–shell nanocrystals prepared using a PVP-assisted polyol reduction method
Source: Royal Society of Chemistry journal article supplement (doi:10.1039/c2ce00037g), 2012-01-01
Supplement: c2ce00037g.pdf [file c2ce00037g.pdf]

## Supplementary Information

Epitaxial growth of Au@Pd core–shell nanocrystals prepared using  
PVP-assisted polyol reduction method

**Masaharu Tsuji,<sup>\*a,b</sup> Koji Ikedo,<sup>b</sup> Mika Matsunaga<sup>a</sup> and Keiko Uto<sup>a</sup>**

<sup>a</sup> *Institute for Materials Chemistry and Engineering, Kyushu University, Kasuga 816-8580, Japan*

<sup>b</sup> *Graduate School of Engineering Sciences, Kyushu University, Kasuga 816-8580, Japan*

<sup>\*</sup>To whom correspondence should be addressed: E-mail: [tsuji@cm.kyushu-u.ac.jp](mailto:tsuji@cm.kyushu-u.ac.jp)

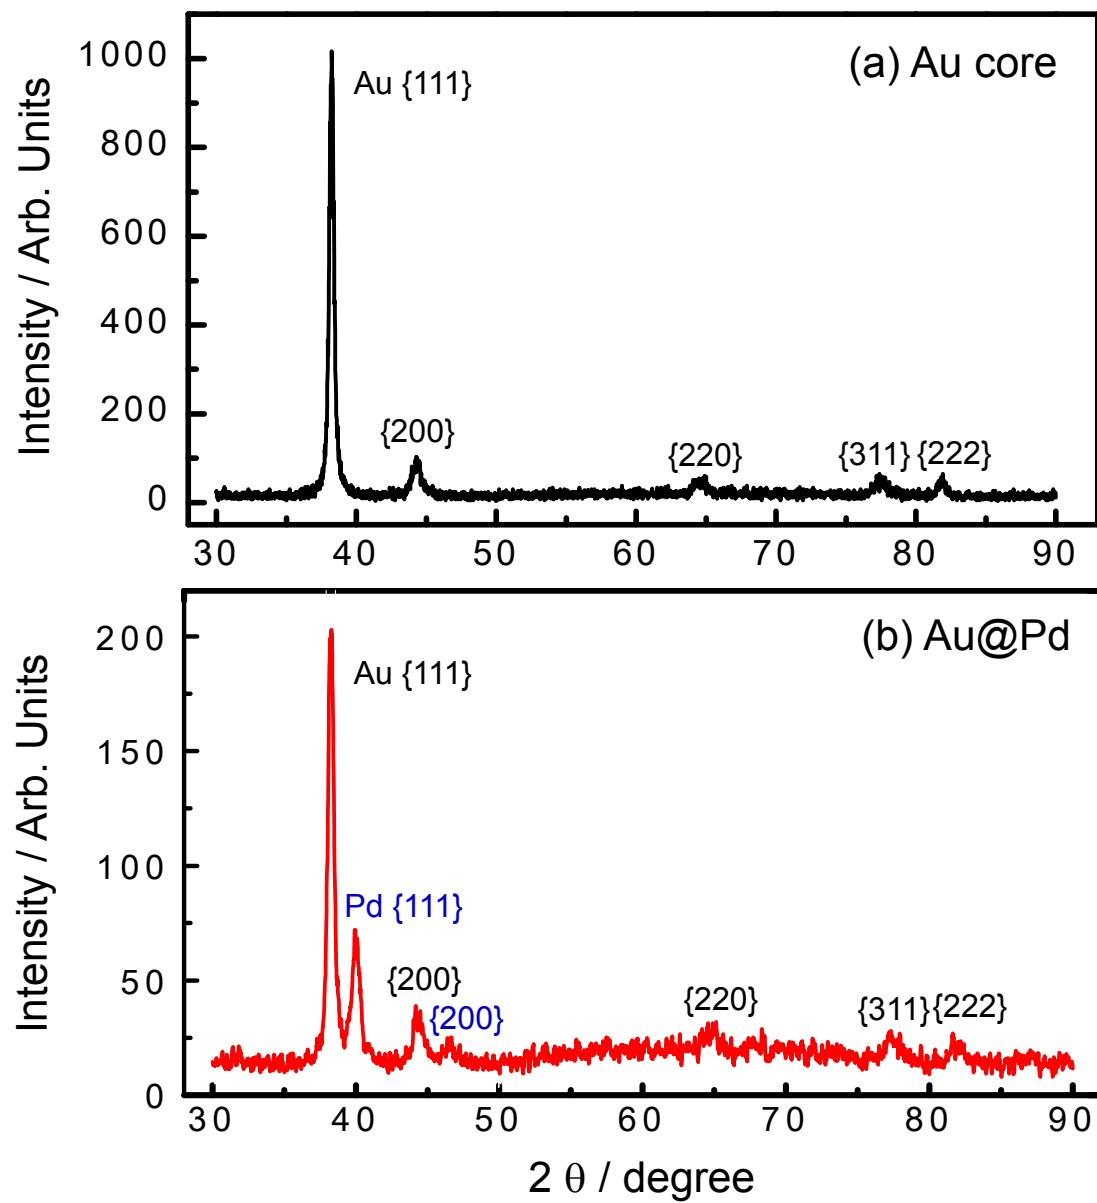

**Fig. S1.** XRD patterns of (a) Au core and (b) Au@Pd nanocrystals prepared at 70 °C.

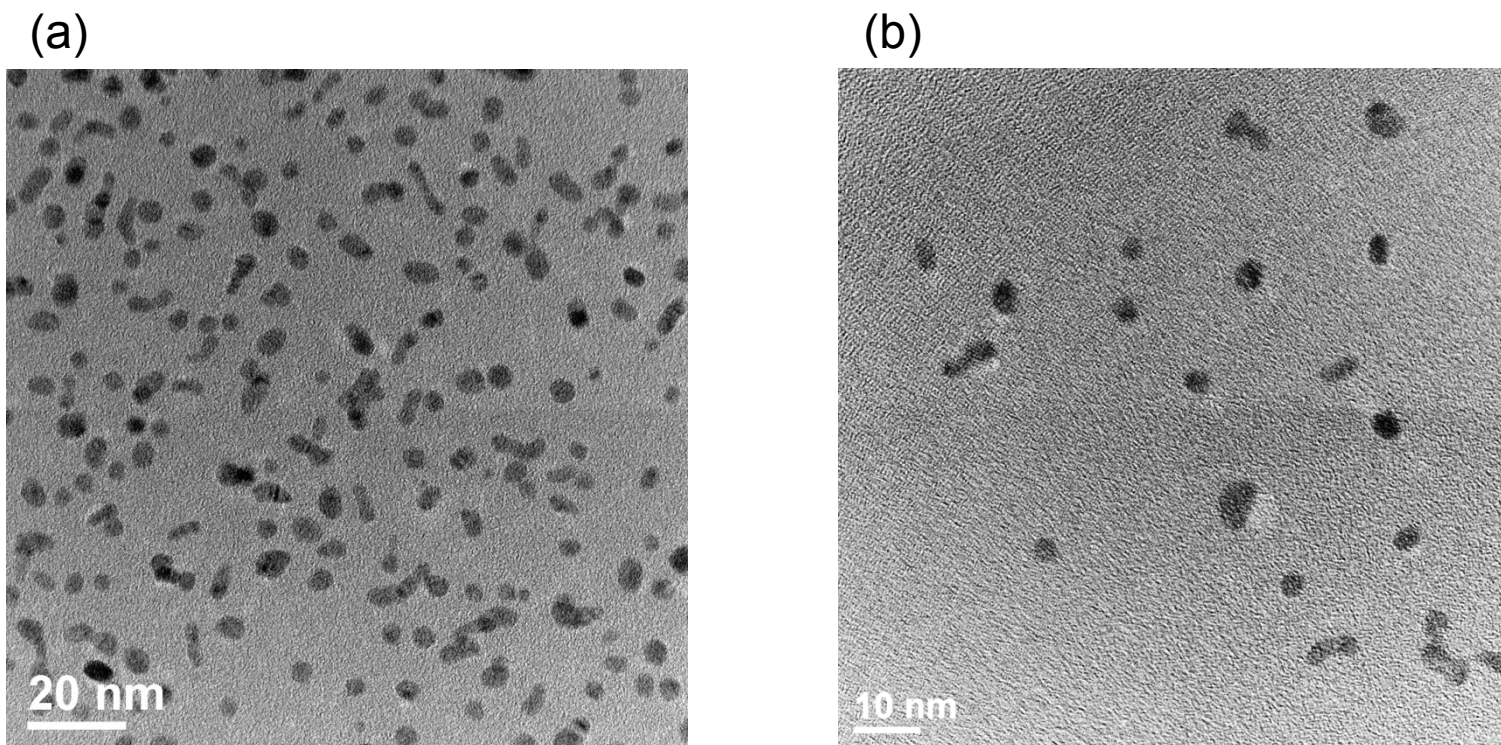

**Fig. S2.** TEM images of Pd nanoparticles prepared in  $\text{Na}_2\text{PdCl}_4$  (2.4 mM)/PVP (Mw: 40,000, 1 M) / EG solution under microwave heating for 3 min at 400 W.
